# Supplementary material for: Synthesis of a celastrol derivative as a cancer stem cell inhibitor through regulation of the STAT3 pathway for treatment of ovarian cancer
Source: Royal Society of Chemistry journal article supplement (doi:10.1039/d4md00468j), 2024-01-01
Supplement: d4md00468j1.pdf [file d4md00468j1.pdf]

## Supplementary Materials

### 1. Supplementary WB

|                |               |                                                                                     |                                                                                      |                                                                                       |
|----------------|---------------|-------------------------------------------------------------------------------------|--------------------------------------------------------------------------------------|---------------------------------------------------------------------------------------|
| STAT3          | 79, 86 kDa    | 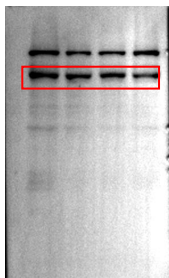   |    |    |
| p-STAT3 (Y705) | 79/86kDa      |    |    |    |
| p-STAT3 (S727) | 88/98kDa<br>a |   |   |   |
| JAK1           | 133kDa        |  |  |  |
| JAK2           | 130kDa        |  |  |  |

|          |                                                                                                 |                                                                                      |                                                                                       |
|----------|-------------------------------------------------------------------------------------------------|--------------------------------------------------------------------------------------|---------------------------------------------------------------------------------------|
| p-JAK1   | 133kDa<br>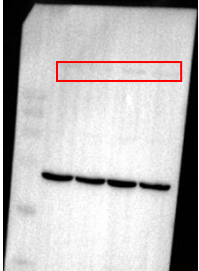     |    |    |
| p-JAK2   | 130kDa<br>     |    |    |
| Mcl-1    | 29/37kDa<br>  |   |   |
| Survivin | 16kDa<br>    |  |  |
| STAT5    | 92kDa<br>    |  |  |
| p-STAT5  | 92/94kDa<br> |  |  |

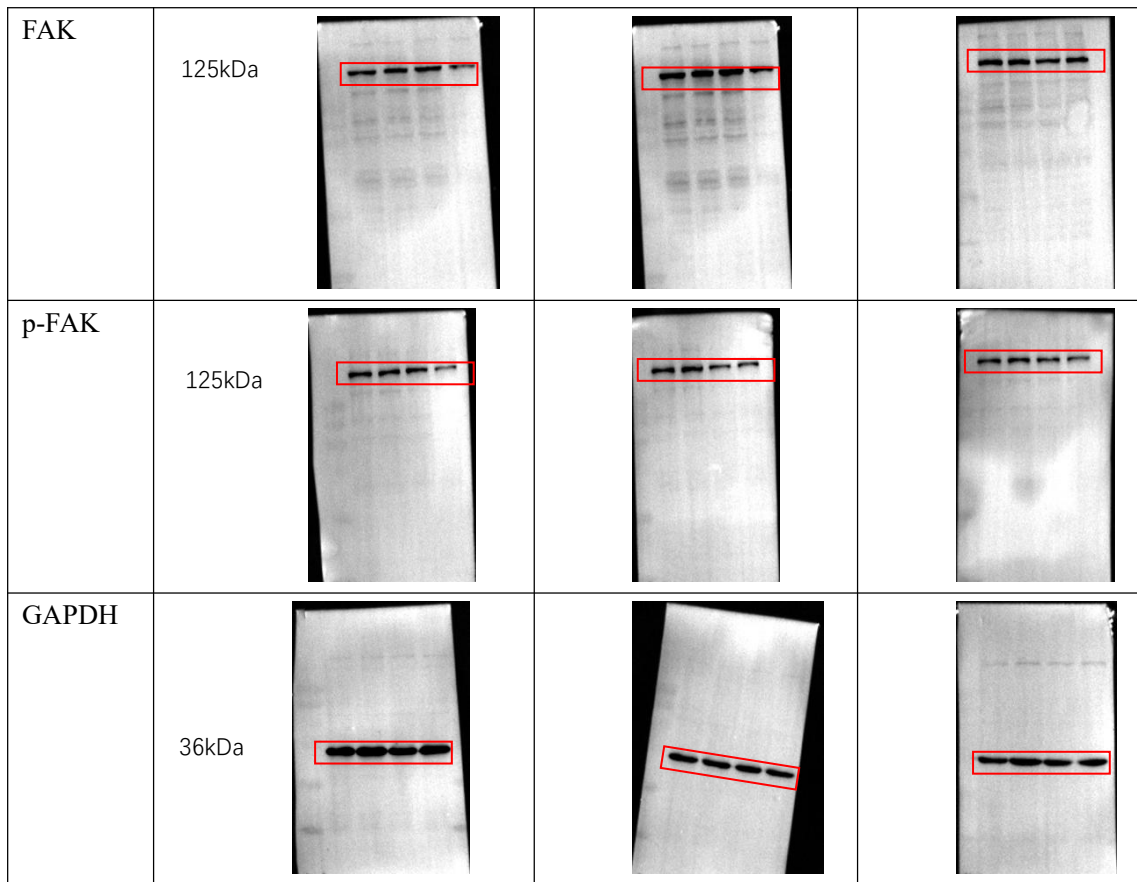

**Supplementary Figure 1.** Full gel images for those cropped in the paper **Fig. 4** and **Fig. 8**. Specific bands shown in the figures are highlighted by red boxes.

## 2. Supplementary Chemistry

(A)

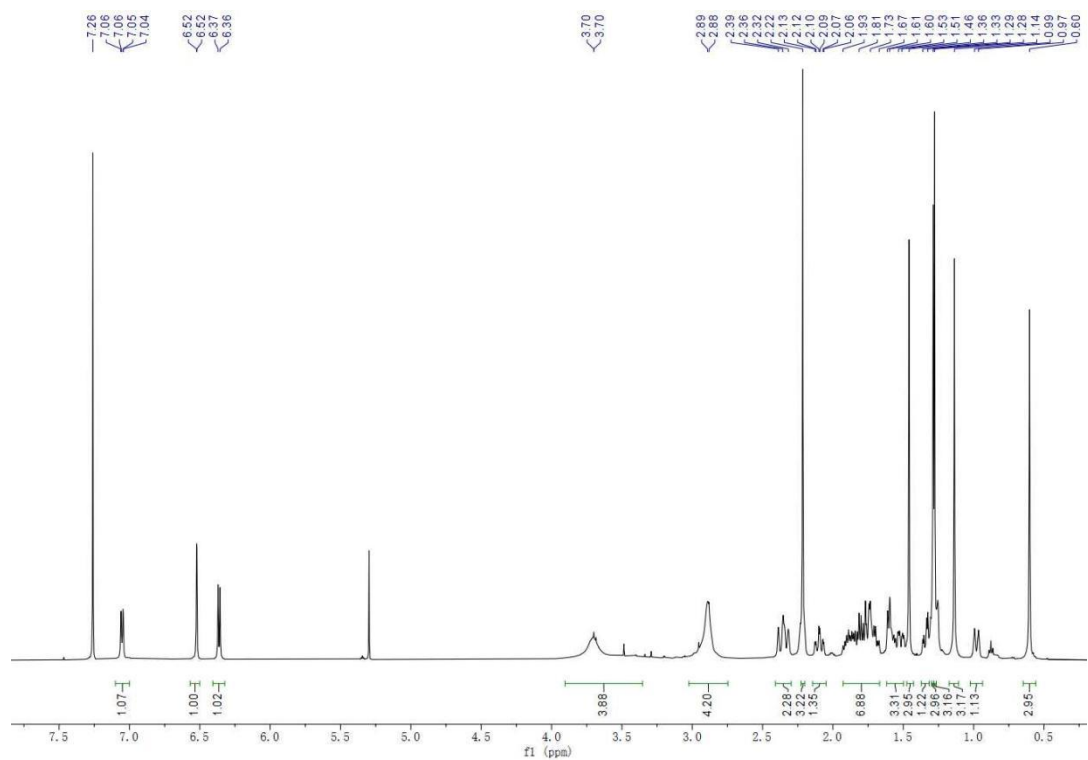

(B)

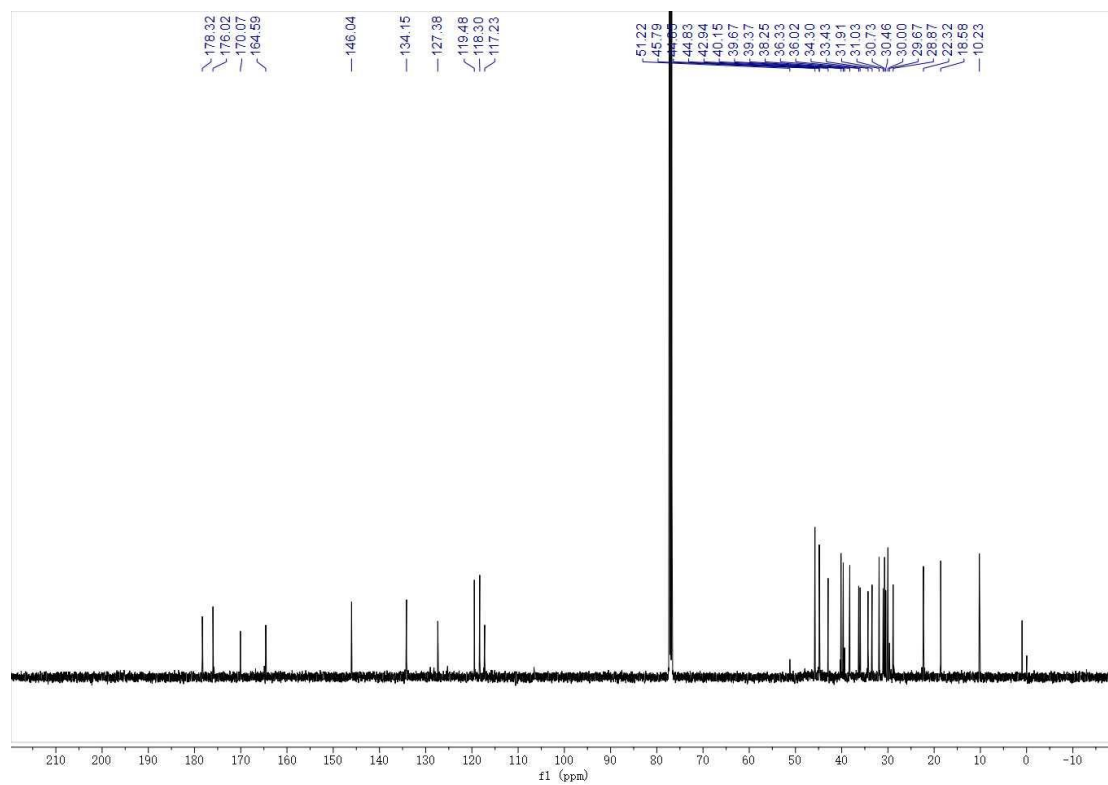

(C)

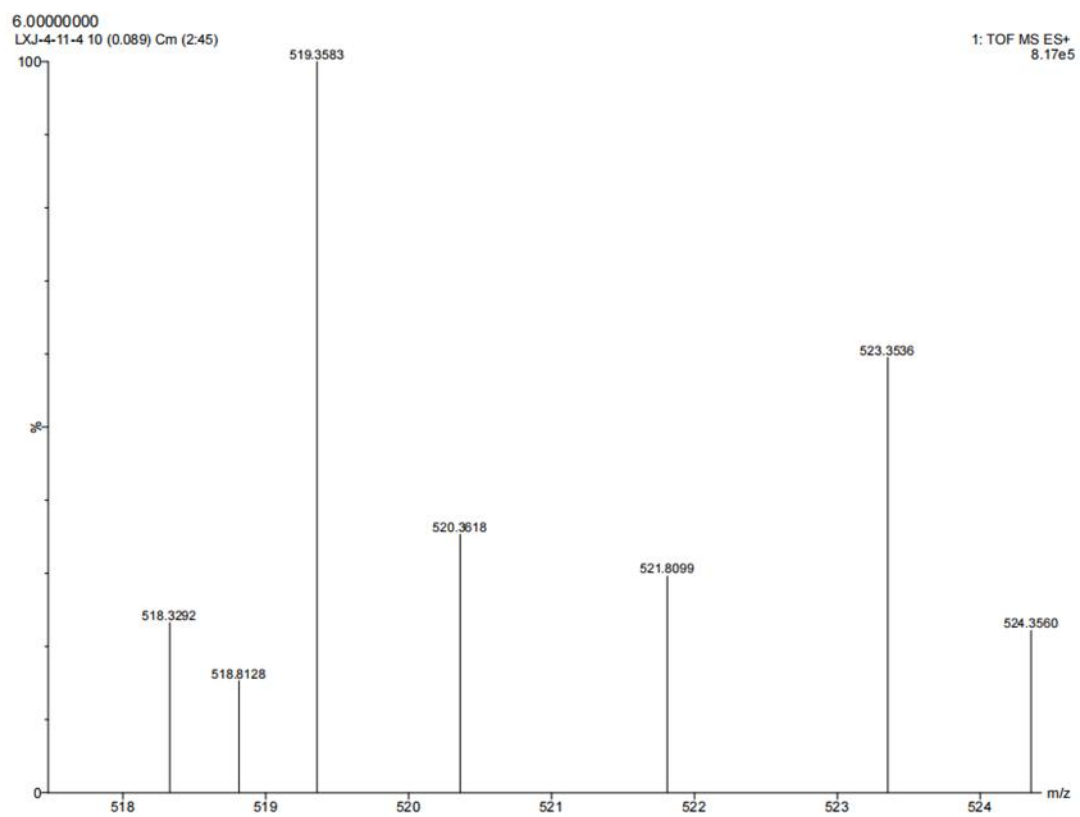

**Supplementary Figure 2.** (A) The  $^1\text{H}$  NMR spectrum of compound **Cel-N**; (B) The  $^{13}\text{C}$  NMR spectrum of compound **Cel-N**; (C) The HR MS spectrum of compound **Cel-N**.

**Instrumental equipment and conditions:** An Agilent 1260 HPLC (Waldbronn, Germany) with diode array detection (DAD) was employed for chromatographic analyses. The column employed was an Agilent Eclipse Plus C18 (250 × 4.6 mm, 5 μm). The mobile phase used methanol and 0.01% phosphoric acid-water with a flow rate of 1.0 mLmin<sup>-1</sup>, and the column temperature was held at 25 °C. The injection volume was set at 10 μL with detection wavelength.

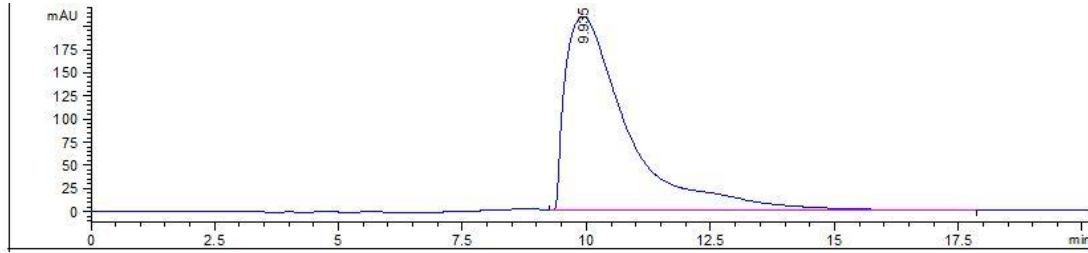

| 峰 # | 保留时间 [min] | 类型 | 峰宽 [min] | 峰面积 [mAU*s] | 峰高 [mAU]  | 峰面积 %    |
|-----|------------|----|----------|-------------|-----------|----------|
| 1   | 9.935      | BB | 1.2881   | 1.81889e4   | 208.42171 | 100.0000 |
